# Supplementary material for: The Importance of Including Non-Household Environments in Dengue Vector Control Activities
Source: Viruses. 2023 Jul 14;15(7):1550. doi: 10.3390/v15071550 (PMC10384488; doi:10.3390/v15071550)
Supplement: Supplementary file 1 [file viruses-15-01550-s001.zip › viruses-2467164-supplementary.pdf]

# The importance of including non-household environments in dengue vector control activities

## Supporting information

Table S1: Variables collected and evaluated in binomial regression model.

| Group                  | Variable              | Description                                                                 |
|------------------------|-----------------------|-----------------------------------------------------------------------------|
| Place of container     | Backyard              |                                                                             |
|                        | Open Bathroom         |                                                                             |
|                        | Drain                 |                                                                             |
|                        | Flower bed            | Also includes flower bush                                                   |
|                        | Garden                |                                                                             |
|                        | Bushes                |                                                                             |
|                        | Open kitchen          |                                                                             |
|                        | Fence                 |                                                                             |
|                        | Veranda               |                                                                             |
|                        | Well                  | Also called borehole                                                        |
|                        | Corridor              |                                                                             |
|                        | Frontyard             |                                                                             |
|                        | Other                 |                                                                             |
| Habitat size container | Small                 | Less than 10 liters                                                         |
|                        | Medium                | Between 10 and 25 liters                                                    |
|                        | Large                 | Larger than 25 liters                                                       |
| Habitat/Container type | Small domestic        | Tins, plastic food containers, bottles, plates, cans, cooking pots and jars |
|                        | Bucket                | Also called basins                                                          |
|                        | Jerrycan              |                                                                             |
|                        | Tire                  |                                                                             |
|                        | Drum                  |                                                                             |
|                        | Animal feeding trough |                                                                             |
|                        | Pot                   | Flower pots                                                                 |
|                        | Treehole              |                                                                             |
|                        | Well                  |                                                                             |
|                        | Other                 | Other type that does not fit in the main container types                    |
| Container covering     | Completely covered    |                                                                             |
|                        | Partially covered     |                                                                             |
|                        | Not covered at all    |                                                                             |
|                        | Not possible to cover |                                                                             |
| Water source           | Rain                  |                                                                             |

|               |                       |  |
|---------------|-----------------------|--|
|               | Borehole              |  |
|               | Tap                   |  |
|               | Stream or river       |  |
|               | Pond                  |  |
|               | Dam                   |  |
|               | Well                  |  |
| Water purpose | Bathing               |  |
|               | Drinking              |  |
|               | Cooking               |  |
|               | Animal water          |  |
|               | Unused or not purpose |  |
|               | Laundry               |  |
|               | Sanitation            |  |

Table S2: Distributions fitted to data from different mosquito stages data. Distributions were checked through Kolmogorov-Smirnov goodness of fit test.

| Stage                                         | Site   | Environment | Distribution | Parameter 1* | Parameter 2* |
|-----------------------------------------------|--------|-------------|--------------|--------------|--------------|
| Proportion of houses with positive containers | Kisumu | HH          | Binomial     | 0.628        | NA           |
|                                               | Ukunda | NH          | Binomial     | 0.527        | NA           |
|                                               | Kisumu | HH          | Binomial     | 0.538        | NA           |
|                                               | Ukunda | NH          | Binomial     | 0.326        | NA           |
| Number of eggs                                | Kisumu | HH          | Log-normal   | 3.3          | 0.672        |
|                                               |        | NH          | Log-normal   | 3.4          | 0.645        |
|                                               | Ukunda | HH          | Log-normal   | 3.53         | 0.797        |
|                                               |        | NH          | Log-normal   | 3.61         | 0.76         |
| Adults                                        | Kisumu | HH          | Weibull      | 3.063        | 4.765        |
|                                               |        | NH          | Log-normal   | 2.045        | 0.482        |
|                                               | Ukunda | HH          | Log-normal   | 2.453        | 0.668        |
|                                               |        | NH          | Log-normal   | 2.589        | 0.903        |

\* For Parameter 1 and Parameter 2, respectively: For Binomial distribution: Probability of having positive containers. for Log-Normal distribution: mean-log and log-sd. For Weibull distribution: Shape and Scale.
